# Supplementary material for: NAP1L1 promotes proliferation and chemoresistance in glioma by inducing CCND1/CDK4/CDK6 expression through its interaction with HDGF and activation of c-Jun
Source: publisher site journal article supplement (doi:10.18632/aging.203805), 2021-12-27
Supplement: Supplementary file [file aging-v13i24-203805-supplementary-material-SD1.pdf]

**SUPPLEMENTARY FIGURES**

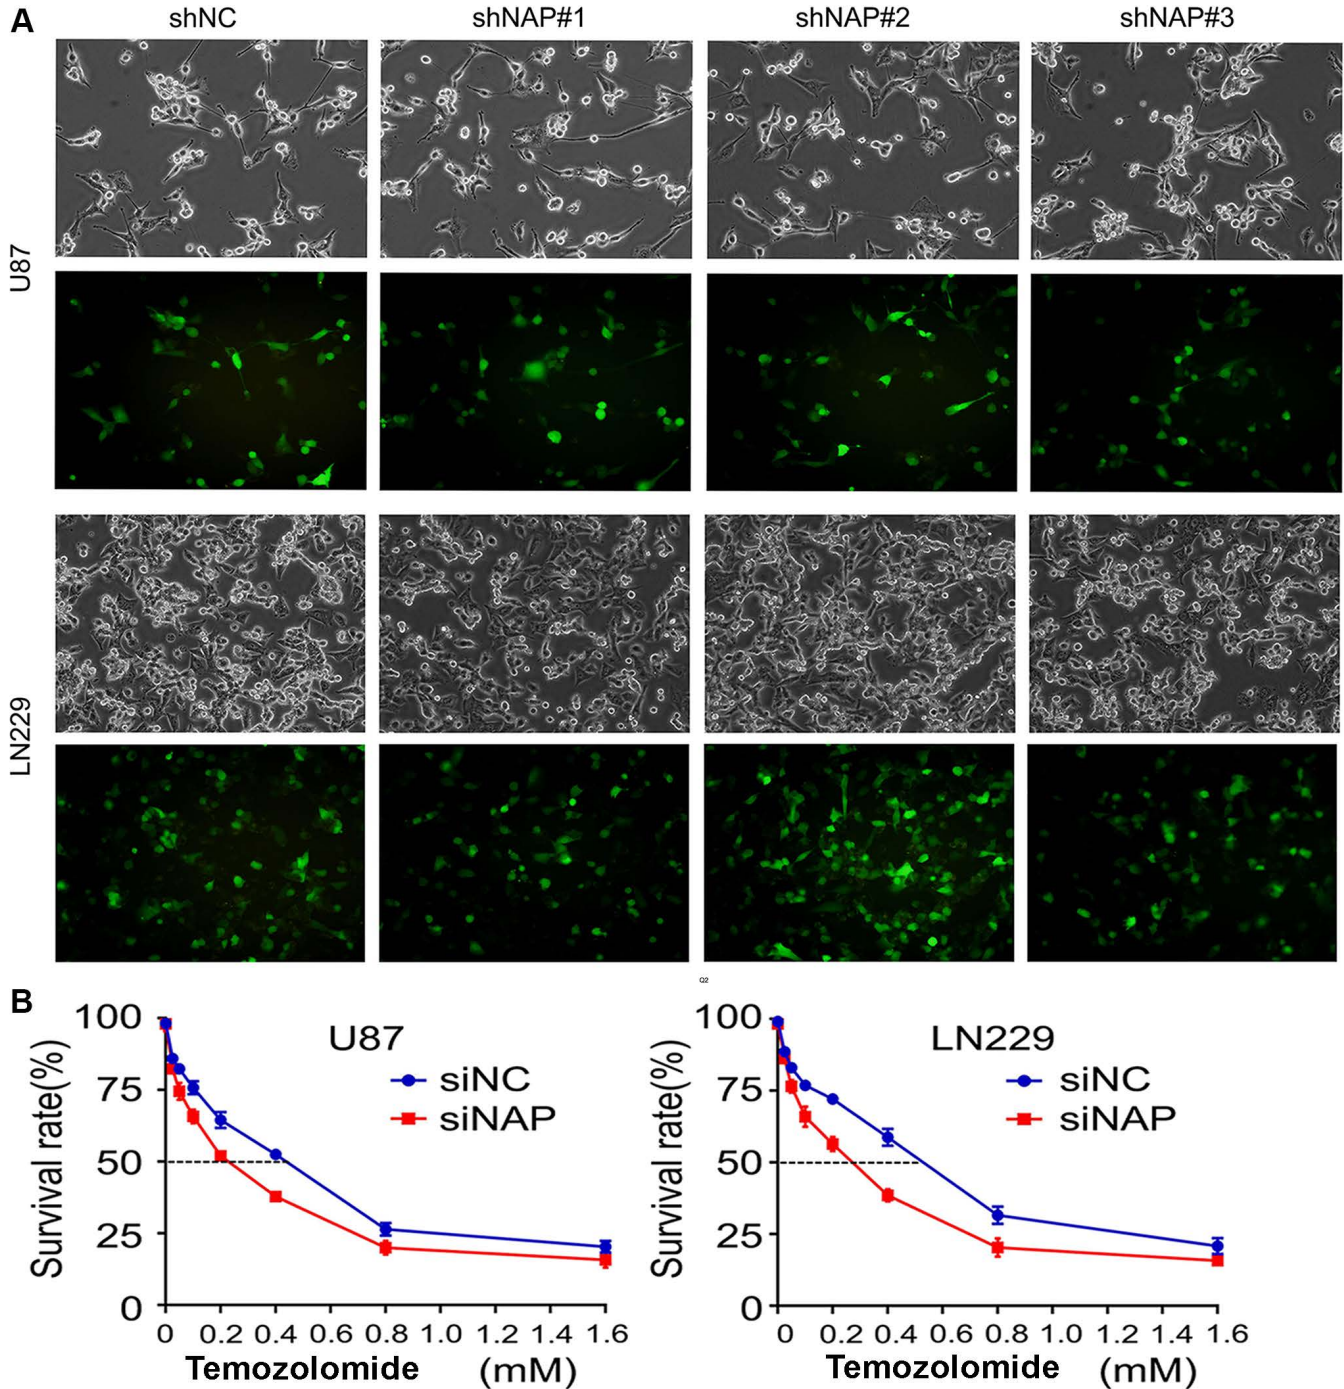

**Supplementary Figure 1.** (A) Representative images of U87 and LN229 cells after transfecting lentiviruses containing shNC or shNAP. Scale bar: 25  $\mu$ m. (B) Dose-response curves of U87 and LN229 treated with shNAP and shNC respectively following treatment with temozolomide for 48 h. Data are presented as the mean  $\pm$  SD for three independent experiments. \* $P < 0.05$ , \*\* $P < 0.01$ , \*\*\* $P < 0.001$ .

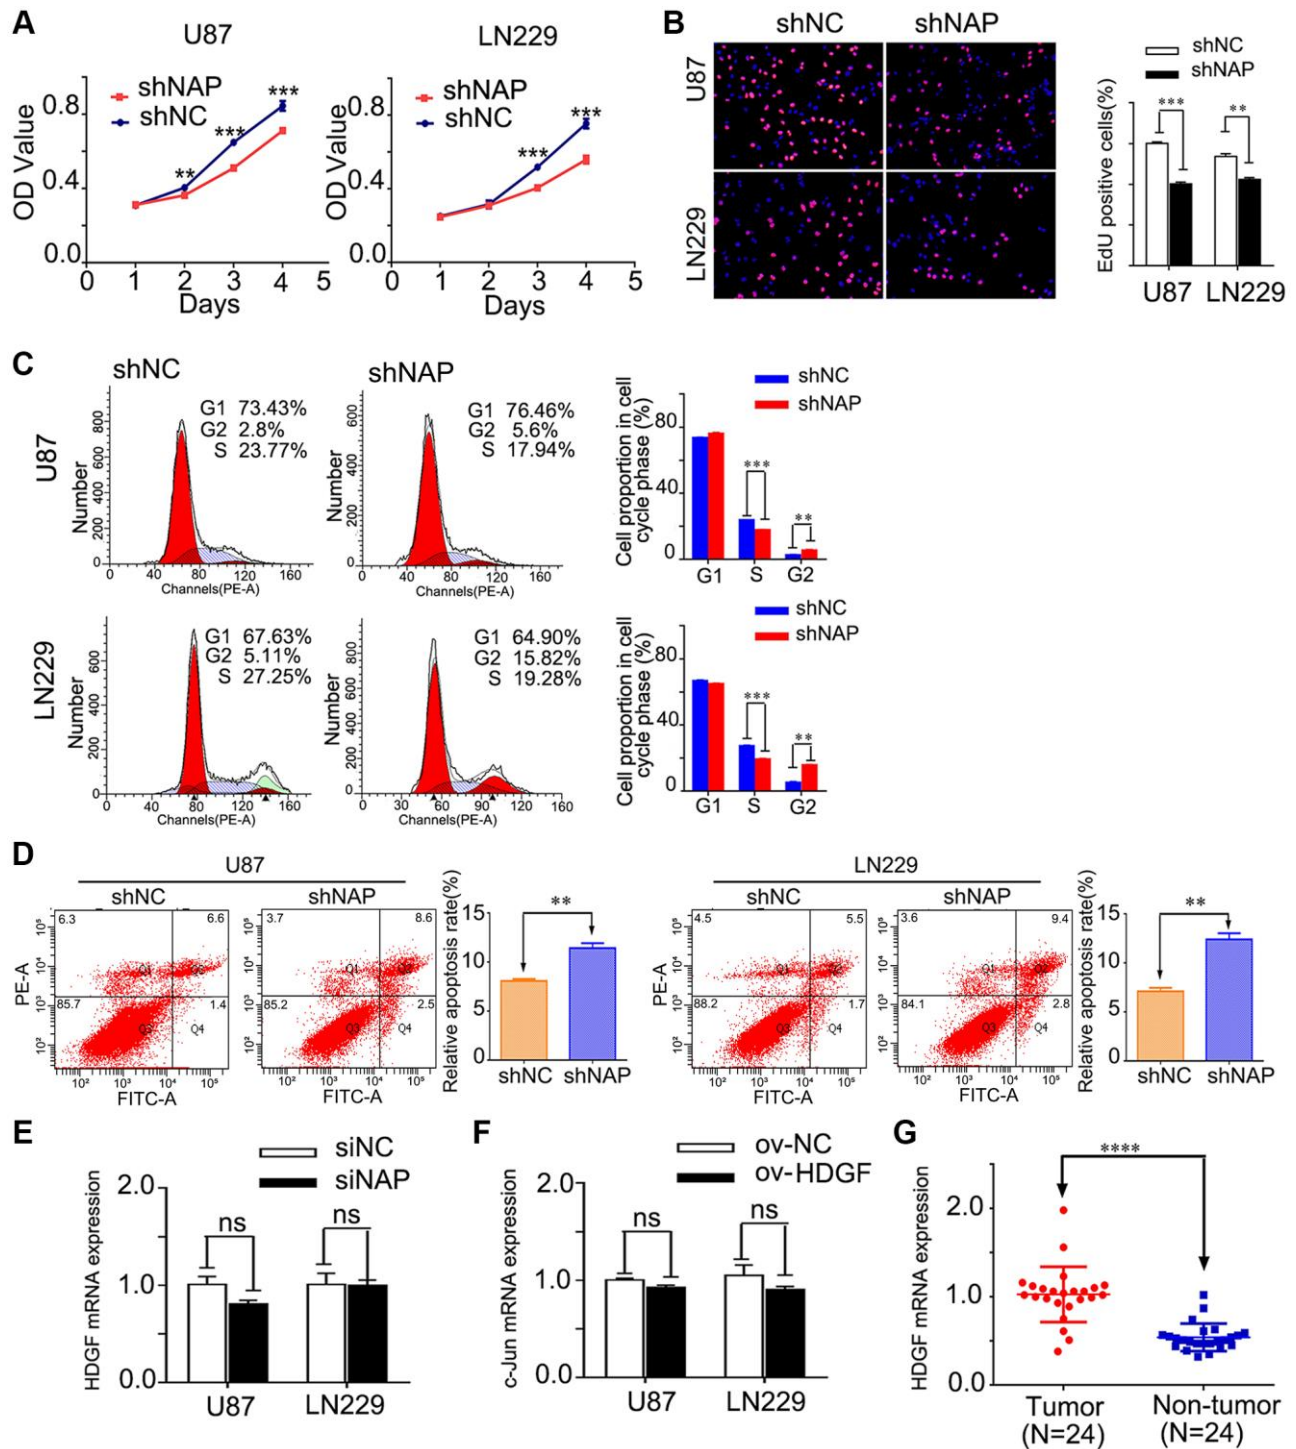

**Supplementary Figure 2. Suppressing NAP111 inhibits glioma cell proliferation, blocks the cell cycle and induces apoptosis.** (A) U87 and LN229 cells were transfected with shNC or shNAP lentiviruses, and then subjected to MTT assay. (B) The proliferation of U87 and LN229 cells transfected with lentiviruses containing shNC or shNAP is measured using the EdU assays. (C, D) The cell cycle distribution (C) and apoptotic fraction (D) in U87 and LN229 cells transfected with lentiviruses containing shNC or shNAP is analyzed by flow cytometry. (E) RT-qPCR analysis of HDGF mRNA expression in U87 and LN229 cells transfected with siNAP111. (F) RT-qPCR analysis of c-Jun mRNA level in U87 and LN229 cells transfected with HDGF-overexpressing plasmid. (G) RT-qPCR analysis of HDGF mRNA expression in 24 glioma tissues and 24 para-tumor tissues. Data are presented as the mean  $\pm$  SD for three independent experiments. \* $P < 0.05$ , \*\* $P < 0.01$ , \*\*\*\* $P < 0.001$ .
