# Supplementary material for: NAP1L1 promotes proliferation and chemoresistance in glioma by inducing CCND1/CDK4/CDK6 expression through its interaction with HDGF and activation of c-Jun
Source: publisher site journal article supplement (doi:10.18632/aging.203805), 2021-12-27
Supplement: Supplementary file [file aging-v13i24-203805-supplementary-material-SD2.pdf]

## SUPPLEMENTARY TABLES

**Supplementary Table 1. shRNA sequences of NAP1L1.**

| NO.                  | 5'         | STEM                      | Loop   | STEM                      | 3'     |
|----------------------|------------|---------------------------|--------|---------------------------|--------|
| NAP1L1-RNAi(78814)-a | Ccgg       | gcCAAGATTGAAGA<br>TGAGAAA | CTCGAG | TTTCTCATCTTCA<br>ATCTTGGC | TTTTTg |
| NAP1L1-RNAi(78814)-b | aattcaaaaa | gcCAAGATTGAAGA<br>TGAGAAA | CTCGAG | TTTCTCATCTTCA<br>ATCTTGGC |        |
| NAP1L1-RNAi(78815)-a | Ccgg       | TTGATAAGCGATTT<br>GAAATTA | CTCGAG | TAATTTCAAATCG<br>CTTATCAA | TTTTTg |
| NAP1L1-RNAi(78815)-b | aattcaaaaa | TTGATAAGCGATTT<br>GAAATTA | CTCGAG | TAATTTCAAATCG<br>CTTATCAA |        |
| NAP1L1-RNAi(78816)-a | Ccgg       | TTCCAATGACTCTT<br>TCTTTAA | CTCGAG | TTAAAGAAAGAG<br>TCATTGGAA | TTTTTg |
| NAP1L1-RNAi(78816)-b | aattcaaaaa | TTCCAATGACTCTT<br>TCTTTAA | CTCGAG | TTAAAGAAAGAG<br>TCATTGGAA |        |

**Supplementary Table 2. siRNA sequences of NAP1L1 and HDGF.**

| Gene   | NO                       | Target Sequence               |
|--------|--------------------------|-------------------------------|
| NAP1L1 | genOFFTM st-h-NAP1L1_001 | GAAGTATGCTGTTCTCTAT           |
|        | genOFFTM st-h-NAP1L1_002 | CCAACAGGATACATTGAAA           |
|        | genOFFTM st-h-NAP1L1_003 | GACAGTTCGTA CTGTGACT          |
| HDGF   | HDGF-RNAi-1              | 5'GAAACGAGAUCGAAUGCAC dTdT 3' |
|        | HDGF-RNAi-2              | 5'CUCAAGCGUUUCCUCCUUA dTdT 3' |
|        | HDGF-RNAi-3              | 5'CCAUACGAUUGACGAGAUG dTdT 3' |

**Supplementary Table 3. The primers used in this study.**

| Primers name |         | Sequence (5'-3')        |
|--------------|---------|-------------------------|
| NAP1L1       | Forward | TTTGCCCTCCTGAAGTTCC     |
|              | Reverse | CCCAACACA ACTTGAGACATCC |
| HDGF         | Forward | ATCAACAGCCAACAAATACC    |
|              | Reverse | TTCTTATCACC GTCACCCT    |
| c-JUN        | Forward | TCAGACAGTGCCC GAGATG    |
|              | Reverse | CTGCTGCGTTAGCATGAGTT    |
| GAPDH        | Forward | CATGGGTGTGAACCATGAGA    |
|              | Reverse | GTCTTCTGGGTGGCAGTGAT    |

**Supplementary Table 4. A list of antibodies used for WB, IF, CoIP and IHC.**

| <b>Antibody</b>  | <b>Cat. No</b>  | <b>Company</b> | <b>Species</b> | <b>Dilution</b>                   |
|------------------|-----------------|----------------|----------------|-----------------------------------|
| NAP1L1           | mAb ab 178687   | Abcam          | Rabbit         | 1:1000(WB); 1:200(IF); 1:20(CoIP) |
| NAP1L1           | ab 33076        | Abcam          | Rabbit         | 1:1000(WB); 1:100(IF); 1:300(IHC) |
| NAP1L1           | pAb #14898-1-AP | Proteintech    | Rabbit         | 1:1000(WB); 1:100(IF); 1:300(IHC) |
| HDGF             | mAb #60064-1-Ig | Proteintech    | Mouse          | 1:1000(WB); 1:50(IF); 1:10(CoIP)  |
| HDGF             | pAb 11344-1-AP  | Proteintech    | Rabbit         | 1:1000(WB); 1:200(IHC)            |
| c-Jun            | mAb #9165       | Cell Signaling | Rabbit         | 1:1000(WB); 1:50(IF); 1:10(CoIP)  |
| c-Jun            | 24909-1-AP      | Proteintech    | Rabbit         | 1:1000(WB); 1:100(IF); 1:10(CoIP) |
| c-Jun            | 28891-1-AP      | Proteintech    | Mouse          | 1:1000(WB); 1:100(IF); 1:10(CoIP) |
| CCND1            | mAb #6086-1-Ig  | Proteintech    | Mouse          | 1:1000(WB)                        |
| PCNA             | mAb #13110      | Cell Signaling | Rabbit         | 1:300(IHC)                        |
| GAPDH            | pAb AP0063      | Bioworld       | Rabbit         | 1:1000(WB)                        |
| BCL2             | ab182858        | Abcam          | Rabbit         | 1:1000(WB)                        |
| Ki-67            | Ab16667         | Abcam          | Mouse          | 1:200(IHC)                        |
| CDK4             | ab199728        | Abcam          | Rabbit         | 1:1000(WB)                        |
| CDK6             | ab241554        | Abcam          | Mouse          | 1:1000(WB)                        |
| Cleaved Caspase3 | Ab214430        | Abcam          | Rabbit         | 1:1000(WB)                        |
